# Supplementary material
Source: publisher figshare collection journal article supplement (https://tandf.figshare.com/articles/dataset/_/1185520)
Supplement: Supplementary file 1 [file 3]

MC

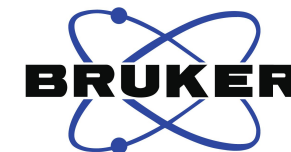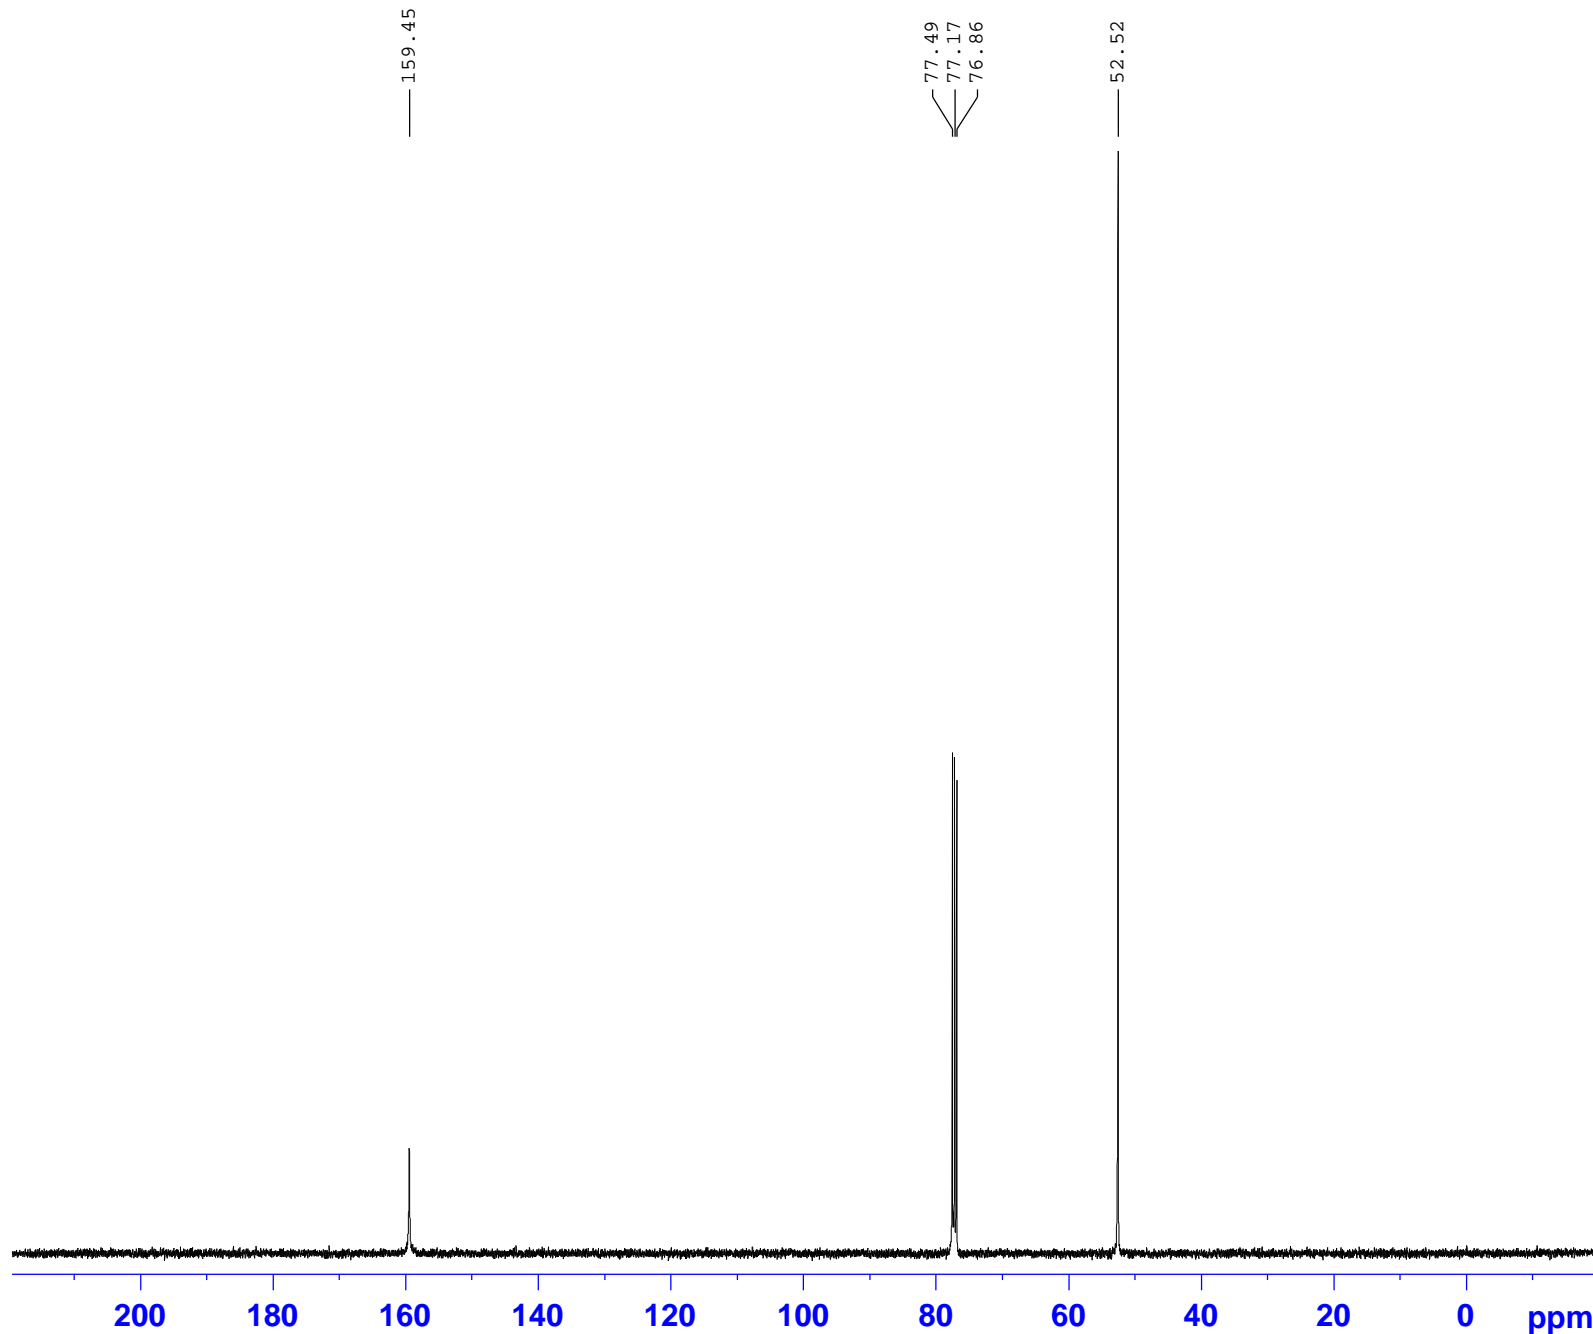

Current Data Parameters

NAME EXT41013  
EXPNO 7  
PROCNO 1

F2 - Acquisition Parameters

Date\_ 20131008  
Time 12.10  
INSTRUM spect  
PROBHD 5 mm PABBO BB/  
PULPROG zgpg30  
TD 65536  
SOLVENT CDCl<sub>3</sub>  
NS 512  
DS 4  
SWH 24038.461 Hz  
FIDRES 0.366798 Hz  
AQ 1.3631988 sec  
RG 127.79  
DW 20.800 usec  
DE 6.50 usec  
TE 297.4 K  
D1 2.00000000 sec  
D11 0.03000000 sec  
TD0 1

===== CHANNEL f1 =====

NUC1 <sup>13</sup>C  
PI 9.80 usec  
PLW1 58.00000000 W  
SFO1 100.6550182 MHz

===== CHANNEL f2 =====

CPDPRG2 waltz16  
NUC2 <sup>1</sup>H  
PCPD2 90.00 usec  
PLW2 14.00000000 W  
PLW12 0.35097000 W  
PLW13 0.28428999 W  
SFO2 400.2596010 MHz

F2 - Processing parameters

SI 32768  
SF 100.6449540 MHz  
WDW EM  
SSB 0  
LB 1.00 Hz  
GB 0  
PC 1.40
