# Supplementary material
Source: publisher figshare collection journal article supplement (https://tandf.figshare.com/articles/dataset/_/1185520)
Supplement: Supplementary file 3 [file 3]

MC

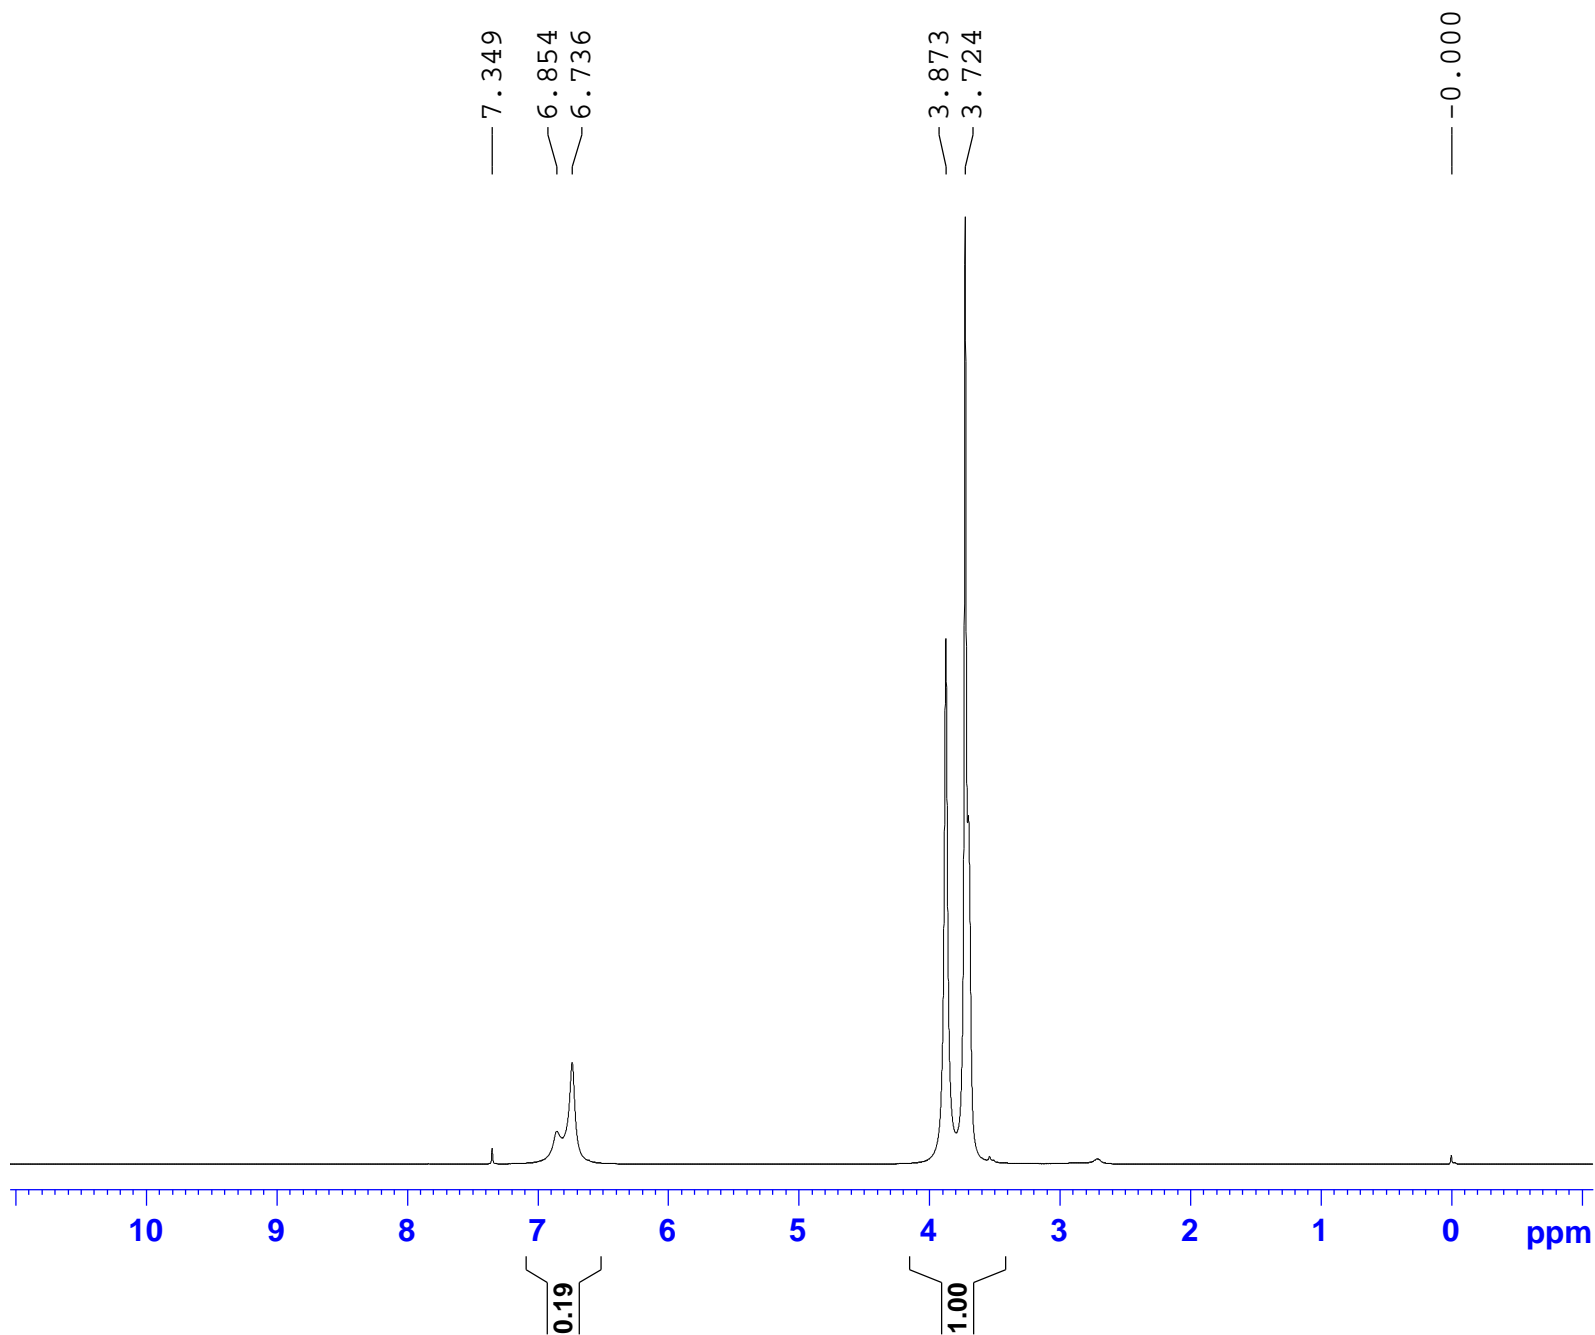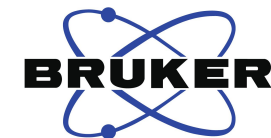

Current Data Parameters

NAME EXT41013  
EXPNO 2  
PROCNO 1

F2 - Acquisition Parameters

Date\_ 20131005  
Time 18.33  
INSTRUM spect  
PROBHD 5 mm PABBO BB/  
PULPROG zg30  
TD 65536  
SOLVENT CDCl3  
NS 16  
DS 2  
SWH 8223.685 Hz  
FIDRES 0.125483 Hz  
AQ 3.9846387 sec  
RG 35.49  
DW 60.800 usec  
DE 6.50 usec  
TE 296.3 K  
D1 1.00000000 sec  
TD0 1

===== CHANNEL f1 =====

NUC1 1H  
P1 14.25 usec  
PLW1 14.00000000 W  
SFO1 400.2604718 MHz

F2 - Processing parameters

SI 65536  
SF 400.2579762 MHz  
WDW EM  
SSB 0  
LB 0.30 Hz  
GB 0  
PC 1.00
